# Supplementary material for: Preparation of magnetically separable and recyclable carbon dots/NiCo2O4 composites with enhanced photocatalytic activity for the degradation of tetracycline under visible light
Source: Royal Society of Chemistry journal article supplement (doi:10.1039/c8qi00290h), 2018-01-01
Supplement: c8qi00290h1.pdf [file c8qi00290h1.pdf]

# Preparation of magnetically separable and recyclable carbon dots/ $\text{NiCo}_2\text{O}_4$ composites with enhanced photocatalytic activity for the degradation of tetracycline under visible light

## Supporting Information

Jinhui Jiang,<sup>a</sup> Weilong Shi,<sup>a</sup> Feng Guo<sup>b</sup> and Songliu Yuan<sup>a\*</sup>

<sup>a</sup>School of Physics, Huazhong University of Science and Technology, Wuhan 430074, China. P.R.

<sup>b</sup>Key Laboratory of Subsurface Hydrology and Ecological Effects in Arid Region, Ministry of Education, School of Environmental Science and Engineering, Chang'an University, Xi'an 710064, China. P.R.

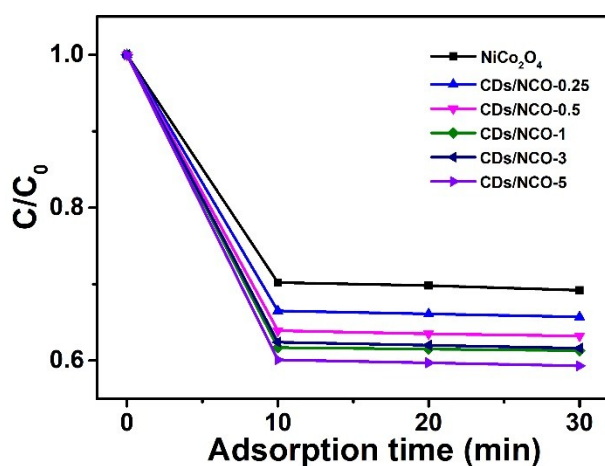

Fig.S1 Adsorption properties of TC over as-prepared products in the dark.

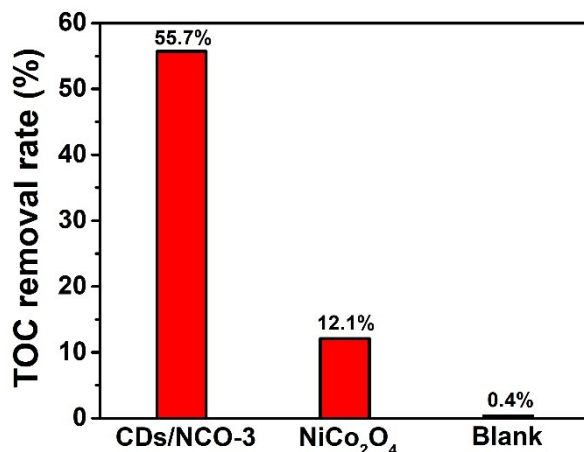

Fig.S2 TOC removal ratio of TC ( $C_0 = 10$  mg/L) over the CDs/NCO-3,  $\text{NiCo}_2\text{O}_4$  and directly photolysis under visible light irradiation ( $\lambda > 420$  nm).

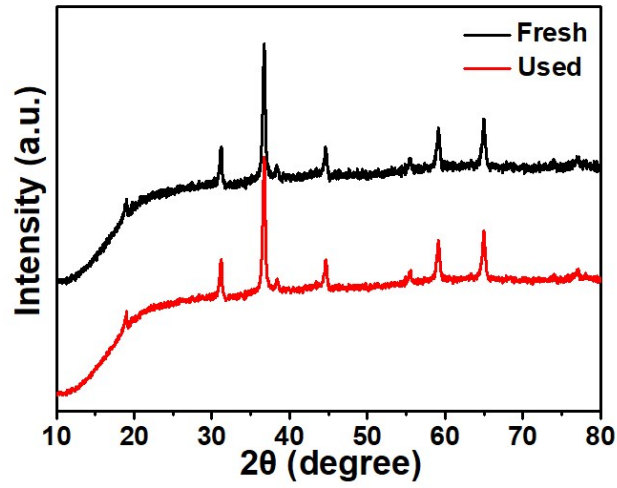

Fig. S3 XRD patterns of the CDs/NCO composite before and after five cycles of photocatalytic reactions.

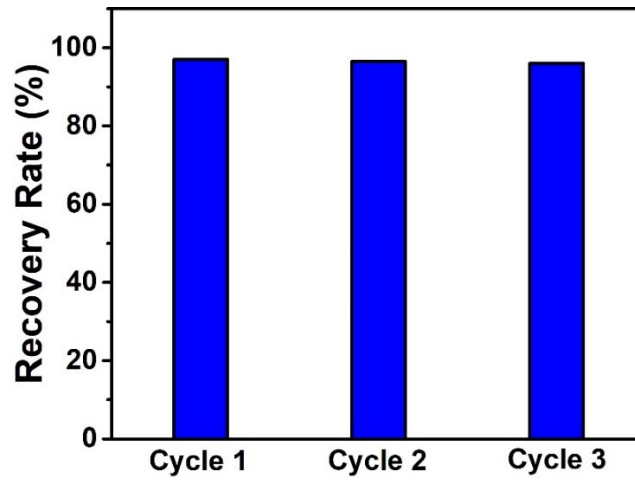

Fig. S4 The recovery rate of the CDs/NCO-3.
